# Supplementary material for: Methionine Sulfoxide Speciation in Mouse Hippocampus Revealed by Global Proteomics Exhibits Age and Alzheimer’s Disease Dependent Changes Targeted to Mitochondrial and Glycolytic Pathways
Source: Preprints.org preprint supplement (doi:10.20944/preprints202404.2007.v1), 2024-04-30
Supplement: Supplementary file 3 [file supplementary]

## Sheet: Standard curve
	Table Standard curves for APOE peptides
	STD (fmoles/μl)	LGA	LGA_ox	NEV	NEV_ox
	0.1	8813000	3366000	770000	1980000
	0.5	42390000	13570000	15780000	9891000
	1	86300000	29540000	32590000	19350000
	10	932000000	299100000	335000000	201000000
	25	2390000000	633400000	864000000	500000000
	50	4085000000	1452000000	1600000000	887700000
	100	7682000000	2647000000	3400000000	1850000000

## Sheet: Stability
		Table PRM Stability assay
	Timepoint	LGADMEDLR	LGAD[M]EDLR	%ox LGA	NEVTMLGSTEEIR	NEVT[M]LGSTEEIR	%ox NEV
	0 Month	5380000000	91700000	1.6759	28300000000	1090000000	3.70874
	1 Month	88700000	1040000	1.1589	86600000	2290000	2.57622
	2 Month	2114000000	38000000	2.50038	3210000000	180700000	5.13958
	6 Month	6861285628	175958038	2.50038	7120130129	385771778	5.13958
	11 Month	1182532466	12297111	1.02919	449470330	20023365	4.26488
